# Supplementary material for: A green approach to nanoplastic detection: SERS with untreated filter paper for polystyrene nanoplastics
Source: Royal Society of Chemistry journal article supplement (doi:10.1039/d4an00702f), 2024-01-01
Supplement: d4an00702f1.pdf [file d4an00702f1.pdf]

Electronic Supplementary Information (ESI)

## A Green Approach to Nanoplastics Detection: SERS with Untreated Filter Paper for Polystyrene Nanoplastics

Boonphop Chaisrihwun,<sup>a,b</sup> Mary Jane Balani,<sup>a,b,c</sup> Sanong Ekgasit,<sup>a,b</sup> Yunfei Xie,<sup>d</sup> Yukihiro Ozaki,<sup>e,\*</sup>  
Prompong Pienpinijtham<sup>a,b,c,\*</sup>

<sup>a</sup>*Sensor Research Unit (SRU), Department of Chemistry, Faculty of Science, Chulalongkorn University,  
Bangkok, 10330, Thailand*

<sup>b</sup>*National Nanotechnology Center of Advanced Structural and Functional Nanomaterials, Faculty of  
Science, Chulalongkorn University, Bangkok 10330, Thailand*

<sup>c</sup>*Green Chemistry and Sustainability Program, Department of Chemistry, Faculty of Science,  
Chulalongkorn University, Bangkok 10330, Thailand*

<sup>d</sup>*School of Food Science and Technology, Jiangnan University, Jiangsu, Wuxi, 214122, China*

<sup>e</sup>*School of Biological and Environmental Sciences, Kwansei Gakuin University, Sanda, Hyogo 669-1330,  
Japan*

\*Corresponding author: yukiz89016@gmail.com; prompong.p@chula.ac.th

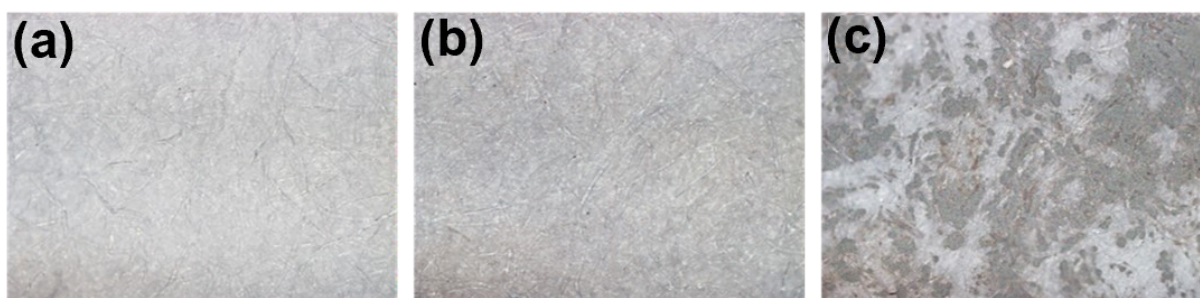

**Figure S1** OM images reveal the surface of the filter paper after filtration with (a) colloidal PSNs, (b) colloidal AgNPs, and (c) PSNs/AgNPs with  $MgCl_2$  as aggregating agents.

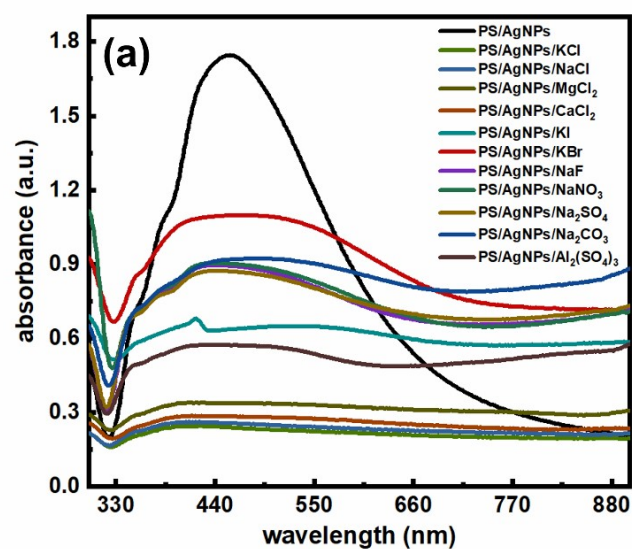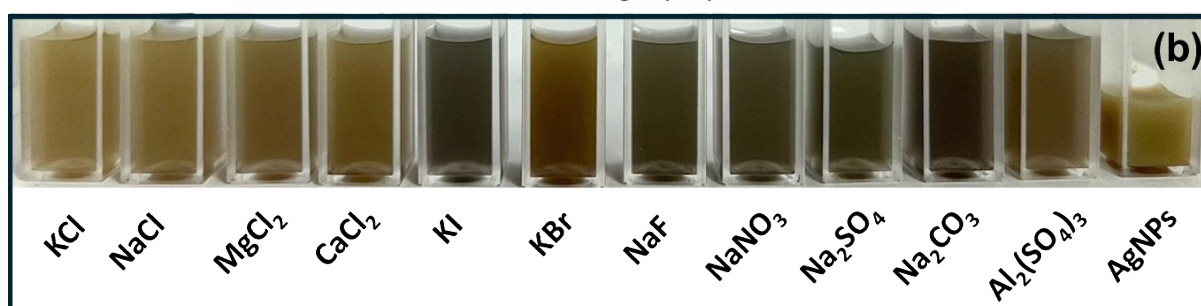

**Figure S2** (a) Changes in the extinction spectra of PS/AgNPs upon particle aggregation after adding different aggregating agents. (b) Changes in the color of PS/AgNPs mixture after the addition of different aggregating agents.

**Table S1** LODs of various sizes of PS obtained using the proposed method.

| PS nanosphere size (nm) | LOD ( $\mu\text{g/mL}$ ) | correlation coefficient ( $r^2$ ) | equation of the line   | linear range ( $\mu\text{g/mL}$ ) |
|-------------------------|--------------------------|-----------------------------------|------------------------|-----------------------------------|
| 100                     | 0.3103                   | 0.9966                            | $y = 30.884x + 81.49$  | 0.5–10.0                          |
| 300                     | 0.5358                   | 0.9976                            | $y = 33.957x + 67.26$  | 0.5–8.0                           |
| 460                     | 0.7613                   | 0.9952                            | $y = 30.100x + 72.78$  | 1.0–8.0                           |
| 600                     | 1.0473                   | 0.9925                            | $y = 21.863x + 98.149$ | 2.0–10.0                          |
| 800                     | 1.4218                   | 0.9895                            | $y = 19.222x + 104.38$ | 2.0–12.0                          |

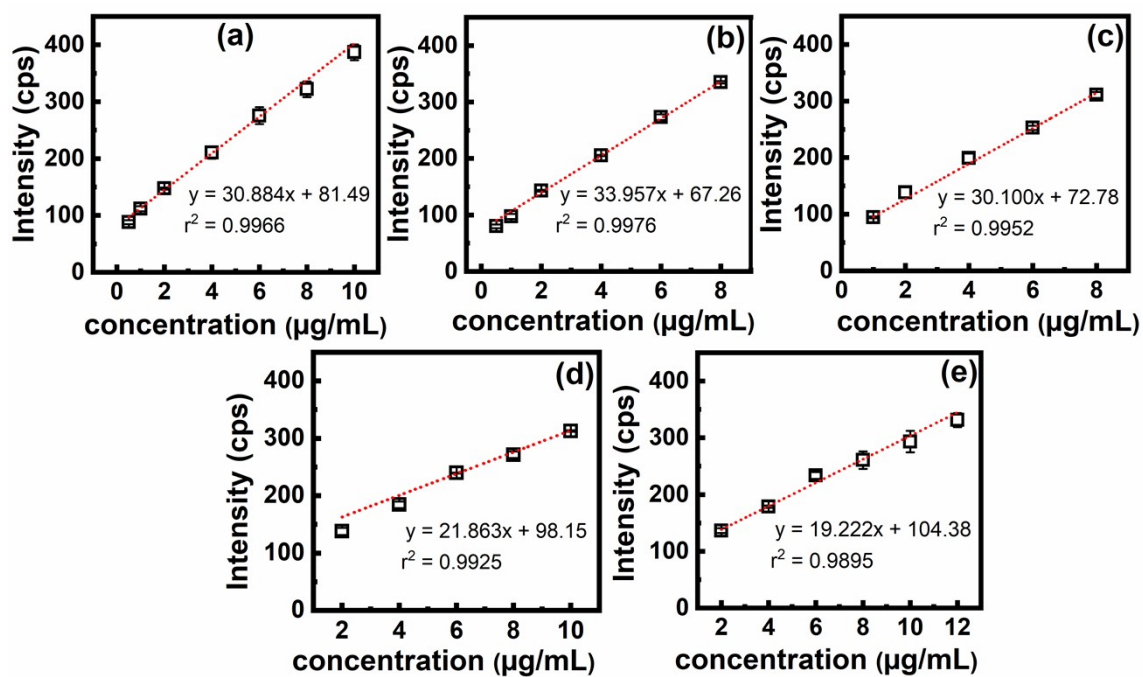

**Figure S3** Plots of the SERS intensity at  $1002\text{ cm}^{-1}$  vs the concentration of (a) 100-nm, (b) 300-nm, (c) 460-nm, (e) 600-nm, and (f) 800-nm PSNSs. Error bars indicate standard deviations of three measurements.

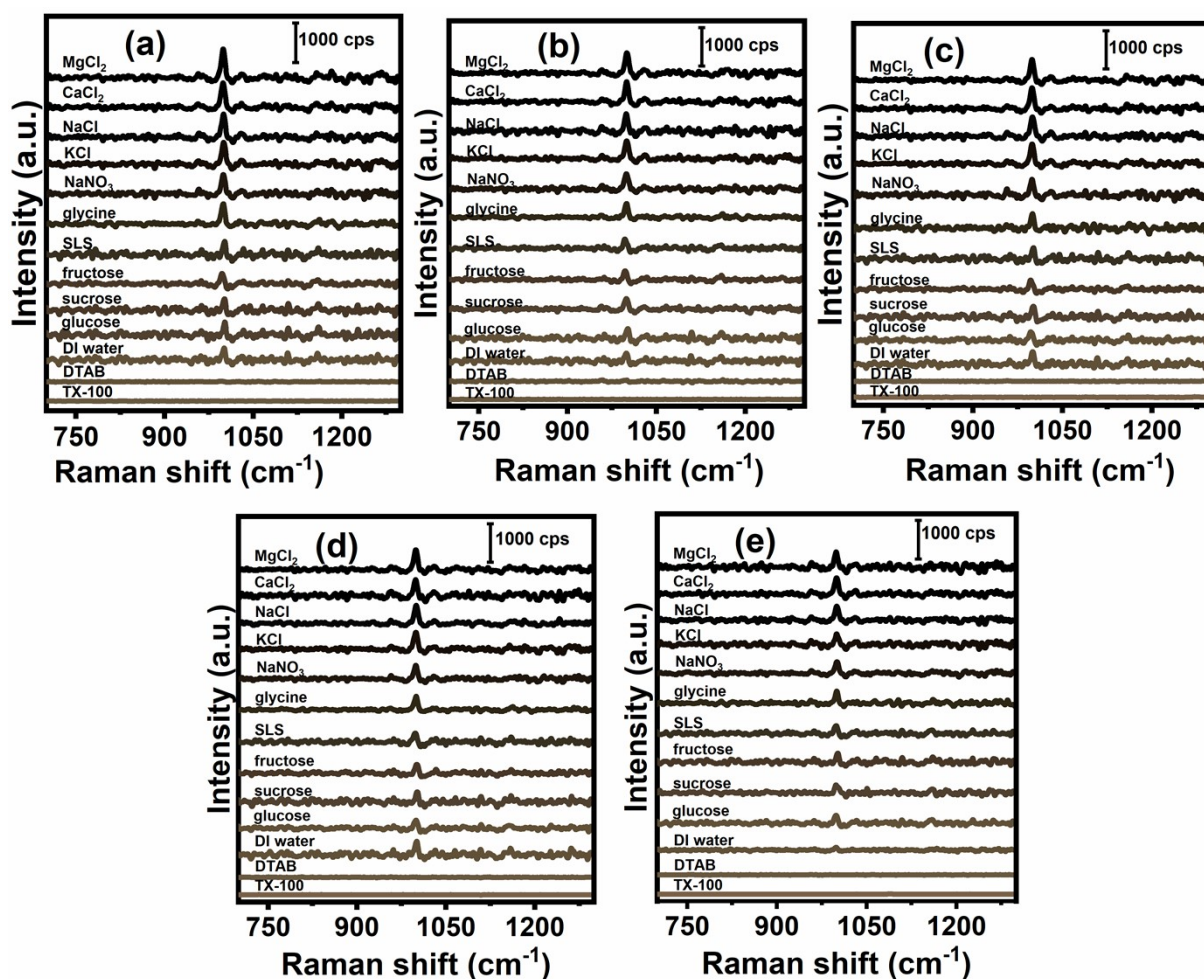

**Figure S4** SERS spectra of (a) 100-nm, (b) 300-nm, (c) 460-nm, (d) 600-nm, and (e) 800-nm PSNSs (10  $\mu\text{g}/\text{mL}$ ) in the presence of different interferences (0.1 wt%).

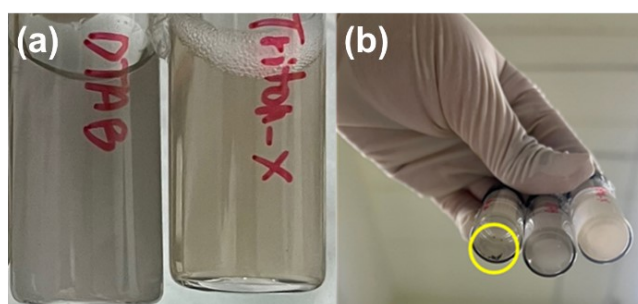

**Figure S5** (a) The prepared SERS samples spiked with 0.1 wt% Triton-X and DTAB as interferences. Despite the discoloration observed after adding 1.0 mL of  $\text{MgCl}_2$  solution, no particle aggregation was recorded. (b) No aggregates were filtered (as compared to the SERS sample with glycine as interference marked with a yellow circle) and thus left only a stain on the filter paper.
